# Supplementary material
Source: ML conference proceedings conference paper supplement (https://openreview.net/forum?id=OcFjqiJ98b)
Supplement: supplementary_material [file attachment]

## Sheet: Sheet1
		Model	Params	Acc
		IN1K-RN18	11279112	60.22
		IN1K-RN34	21387272	62.81
		IN1K-RN50	23917832	62.98
		IN1K-ViT-B-16	85952456	82.4
		INat-RN50	28380424	85.83
		NTS-Net	29033133	87.04
		IN1K-RN18xS	100295149	83.6
		IN1K-RN34xS	110403309	83.83
		IN1K-RN50xS	112933869	83.62
		IN1K-ViT-B-16xS	174968493	88.45
		INat-RN50xS	117396461	88.45
		NTS-NetxS	118049170	87.14
